# Supplementary material for: Investigating Nutrition-Related Complications and Quality of Life in Patients With Gastroenteropancreatic Neuroendocrine Tumors: Protocol for a Mixed-Methods Prospective Study
Source: PubMed Central journal article supplement (PMC6315228; doi:10.2196/11228), 2018-12-19
Supplement: resprot_v7i12e11228_app1.pdf [file resprot_v7i12e11228_app1.pdf]

Table 1. Schedule of data collection.

| Data and measure   |                                      | Method         |                |                |                |                 | Site            |                  |   | Time after initial appointment at recruitment site (months) |   |   |   |   |   |
|--------------------|--------------------------------------|----------------|----------------|----------------|----------------|-----------------|-----------------|------------------|---|-------------------------------------------------------------|---|---|---|---|---|
|                    |                                      | A <sup>a</sup> | Q <sup>b</sup> | U <sup>c</sup> | B <sup>d</sup> | MR <sup>e</sup> | PM <sup>f</sup> | ONJ <sup>g</sup> | 0 | 1                                                           | 2 | 3 | 4 | 5 | 6 |
| HRQoL <sup>h</sup> | EORTC QLQ-C30 <sup>i</sup>           |                | X              |                |                |                 | X               | X                | X |                                                             |   |   |   |   | X |
|                    | EORTC QLQ-GI.NET21 <sup>j</sup>      |                | X              |                |                |                 | X               | X                | X |                                                             |   |   |   |   | X |
|                    | COST-FACIT <sup>k</sup>              |                | X              |                |                |                 | X               | X                | X |                                                             |   |   |   |   | X |
|                    | HADS <sup>l</sup>                    |                | X              |                |                |                 | X               | X                | X |                                                             |   |   |   |   | X |
| Symptoms           | EORTC QLQ-C30                        |                | X              |                |                |                 | X               | X                | X |                                                             | X |   | X |   | X |
|                    | EORTC QLQ-GI.NET21                   |                | X              |                |                |                 | X               | X                | X |                                                             | X |   | X |   | X |
| Vitamins and iron  | Niacin                               |                |                | X              |                |                 | X               |                  | X |                                                             |   |   |   |   | X |
|                    | Vitamin D                            |                |                |                | X              |                 | X               |                  | X |                                                             |   |   |   |   | X |
|                    | Vitamin E                            |                |                |                | X              |                 | X               |                  | X |                                                             |   |   |   |   | X |
|                    | Vitamin A                            |                |                |                | X              |                 | X               |                  | X |                                                             |   |   |   |   | X |
|                    | Vitamin B12                          |                |                |                | X              |                 | X               |                  | X |                                                             |   |   |   |   | X |
|                    | Folate                               |                |                |                | X              |                 | X               |                  | X |                                                             |   |   |   |   | X |
|                    | Iron studies                         |                |                |                | X              |                 | X               |                  | X |                                                             |   |   |   |   | X |
| Nutritional status | PG-SGA <sup>m</sup>                  |                | X              |                |                |                 | X               |                  | X |                                                             | X |   | X |   | X |
|                    | BIA <sup>n</sup> (FFM <sup>o</sup> ) | X              |                |                |                |                 | X               | X                | X |                                                             | X |   | X |   | X |
|                    | Weight                               | X              |                |                |                |                 | X               | X                | X |                                                             | X |   | X |   | X |

|                   |                              |   |   |   |   |   |   |   |   |
|-------------------|------------------------------|---|---|---|---|---|---|---|---|
|                   | Height                       | X |   | X | X | X |   |   |   |
|                   | Body mass index              | X |   | X | X | X | X | X | X |
| Dietitian contact | Questionnaire 1.0, Section 1 | X | X | X | X | X | X | X | X |
| Dietary habits    | Questionnaire 1.0, Section 2 | X |   | X | X | X | X | X | X |
| Medication        | Questionnaire 2.0            | X | X | X | X | X | X | X | X |
| Interview         | N/A <sup>p</sup>             |   |   | X | X | X |   |   | X |

<sup>a</sup>A: anthropometric measure.

<sup>b</sup>Q: questionnaire

<sup>c</sup>U: 24-hour urine sample.

<sup>d</sup>B: blood test.

<sup>e</sup>MR: medical record.

<sup>f</sup>PM: Peter MacCallum Cancer Centre.

<sup>g</sup>ONJ: Olivia Newton-John Cancer Wellness & Research Centre.

<sup>h</sup>HRQoL: health-related quality of life.

<sup>i</sup>EORTC QLQ-C30: European Organisation for Research and Treatment of Cancer Quality of Life Questionnaire-C30.

<sup>j</sup>EORTC QLQ-GI.NET21: European Organisation for Research and Treatment of Cancer Quality of Life Questionnaire Module GI.NET21

<sup>k</sup>COST-FACIT: Comprehensive Score for Financial Toxicity-Functional Assessment of Chronic Illness Therapy.

<sup>l</sup>HADS: Hospital and Anxiety Depression Scale.

<sup>m</sup>PG-SGA: Patient-Generated Subjective Global Assessment.

<sup>n</sup>BIA: bioelectrical impedance analysis.

<sup>o</sup>FFM: fat-free mass.

<sup>p</sup>N/A: not applicable.
